# Supplementary material
Source: publisher figshare collection journal article supplement (https://rs.figshare.com/ndownloader/files/17379698)
Supplement: Supplementary file 1 [file 17379698]

function dy=defor_xi(~,y)

global l1 l2 Jb

dy=zeros(2,1);

%stretch of dashpot

dy(1)=Jb*y(1)*((l1^2*y(1)^(-2)-y(1)^2*y(2)^2*(l1*l2)^(-2))-(l2^2*y(2)^(-2)-y(1)^2*y(2)^2*(l1*l2)^(-2))/2)/(Jb-l1^2*y(1)^(-2)-l2^2*y(2)^(-2)-y(1)^2*y(1)^2*(l1*l2)^(-2)+3)/3;

dy(2)=Jb*y(2)*((l2^2*y(2)^(-2)-y(1)^2*y(2)^2*(l1*l2)^(-2))-(l1^2*y(1)^(-2)-y(1)^2*y(2)^2*(l1*l2)^(-2))/2)/(Jb-l1^2*y(1)^(-2)-l2^2*y(2)^(-2)-y(1)^2*y(1)^2*(l1*l2)^(-2)+3)/3;

end
